# Supplementary material for: PtRu/C catalyst slurry preparation for large-scale decal transfer with high performance of proton exchange membrane fuel cells
Source: Royal Society of Chemistry journal article supplement (doi:10.1039/c8ra07754a), 2018-01-01
Supplement: c8ra07754a1.pdf [file c8ra07754a1.pdf]

## Supplemental information

# PtRu/C catalyst slurry preparation for large-scale decal transfer with high performance of proton exchange membrane fuel cells

Mihwa Choi,<sup>†ab</sup> Jong Kwan Kim,<sup>†c</sup> Jungsuk Kim,<sup>a</sup> Seugran Yang,<sup>a</sup> Ji-Eun Park,<sup>de</sup> Ok-Hee Kim<sup>\*f</sup> and Yong-Hun Cho<sup>\*c</sup>

<sup>a</sup> *Creative Future Laboratory, Korea Electric Power Corporation (KEPCO) Research Institute, Naju 58217, South Korea*

<sup>b</sup> *Department of Chemistry, Sogang University, Seoul 04107, South Korea*

<sup>c</sup> *Department of Chemical Engineering, Kangwon National University, Samcheok 25913, South Korea*

<sup>d</sup> *Center for Nanoparticle Research, Institute for Basic Science (IBS), Seoul 08826, South Korea*

<sup>e</sup> *School of Chemical and Biological Engineering, Seoul National University (SNU), Seoul 08826, South Korea*

<sup>f</sup> *Department of Science, Republic of Korea Naval Academy, Jinhae-gu, Changwon 51704, South Korea*

<sup>†</sup> *These authors contributed equally to this work.*

<sup>\*</sup> *Corresponding authors: yhun00@gmail.com (Y.-H. Cho) and koh0715@navy.ac.kr (O.-H. Kim).*

### Table of contents

Figure S1: Contact angle picture of a PtRu/C catalyst slurry drop on a substrate Kapton film.

Figure S2: Polarization and power density curves of Pt/C- and PtRu/C-based MEA using decal transfer method.

| Run 1                                                                                                                                                                                                                                                                                                                                                 | Run 2                                                                                                                                                                                                                                                                                                                                                 | Run 3                                                                                                                                                                                                                                                                                                                                                  |
|-------------------------------------------------------------------------------------------------------------------------------------------------------------------------------------------------------------------------------------------------------------------------------------------------------------------------------------------------------|-------------------------------------------------------------------------------------------------------------------------------------------------------------------------------------------------------------------------------------------------------------------------------------------------------------------------------------------------------|--------------------------------------------------------------------------------------------------------------------------------------------------------------------------------------------------------------------------------------------------------------------------------------------------------------------------------------------------------|
| 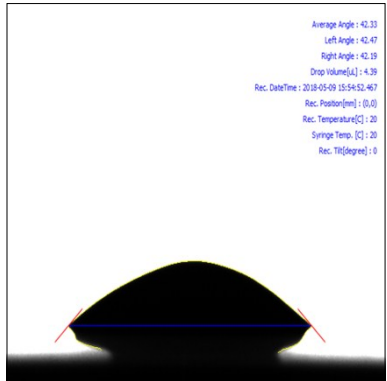 <p>Average Angle : 42.33<br/>Left Angle : 42.47<br/>Right Angle : 42.19<br/>Drop Volume[μL] : 4.39<br/>Rec. DateTime : 2018-05-09 15:54:52.467<br/>Rec. Position[mm] : (0,0)<br/>Rec. Temperature[°C] : 20<br/>Syringe Temp. [°C] : 20<br/>Rec. TH[degree] : 0</p>  |  <p>Average Angle : 40.84<br/>Left Angle : 40.59<br/>Right Angle : 41.09<br/>Drop Volume[μL] : 3.08<br/>Rec. DateTime : 2018-05-09 15:55:17.086<br/>Rec. Position[mm] : (0,0)<br/>Rec. Temperature[°C] : 20<br/>Syringe Temp. [°C] : 20<br/>Rec. TH[degree] : 0</p>  |  <p>Average Angle : 41.30<br/>Left Angle : 40.80<br/>Right Angle : 41.81<br/>Drop Volume[μL] : 3.54<br/>Rec. DateTime : 2018-05-09 15:55:50.359<br/>Rec. Position[mm] : (0,0)<br/>Rec. Temperature[°C] : 20<br/>Syringe Temp. [°C] : 20<br/>Rec. TH[degree] : 0</p> |
| Run 4                                                                                                                                                                                                                                                                                                                                                 | Run 5                                                                                                                                                                                                                                                                                                                                                 |                                                                                                                                                                                                                                                                                                                                                        |
|  <p>Average Angle : 42.32<br/>Left Angle : 42.31<br/>Right Angle : 42.33<br/>Drop Volume[μL] : 4.13<br/>Rec. DateTime : 2018-05-09 15:56:38.574<br/>Rec. Position[mm] : (0,0)<br/>Rec. Temperature[°C] : 20<br/>Syringe Temp. [°C] : 20<br/>Rec. TH[degree] : 0</p> |  <p>Average Angle : 34.11<br/>Left Angle : 34.15<br/>Right Angle : 34.07<br/>Drop Volume[μL] : 3.54<br/>Rec. DateTime : 2018-05-09 15:57:21.542<br/>Rec. Position[mm] : (0,0)<br/>Rec. Temperature[°C] : 20<br/>Syringe Temp. [°C] : 20<br/>Rec. TH[degree] : 0</p> |                                                                                                                                                                                                                                                                                                                                                        |
| Sample                                                                                                                                                                                                                                                                                                                                                | Run #                                                                                                                                                                                                                                                                                                                                                 | Contact angle / °                                                                                                                                                                                                                                                                                                                                      |
| PtRu/C in IPA                                                                                                                                                                                                                                                                                                                                         | 1                                                                                                                                                                                                                                                                                                                                                     | 42.3                                                                                                                                                                                                                                                                                                                                                   |
|                                                                                                                                                                                                                                                                                                                                                       | 2                                                                                                                                                                                                                                                                                                                                                     | 40.8                                                                                                                                                                                                                                                                                                                                                   |
|                                                                                                                                                                                                                                                                                                                                                       | 3                                                                                                                                                                                                                                                                                                                                                     | 41.3                                                                                                                                                                                                                                                                                                                                                   |
|                                                                                                                                                                                                                                                                                                                                                       | 4                                                                                                                                                                                                                                                                                                                                                     | 42.3                                                                                                                                                                                                                                                                                                                                                   |
|                                                                                                                                                                                                                                                                                                                                                       | 5                                                                                                                                                                                                                                                                                                                                                     | 34.1                                                                                                                                                                                                                                                                                                                                                   |
|                                                                                                                                                                                                                                                                                                                                                       | Standard deviation                                                                                                                                                                                                                                                                                                                                    | 3.5                                                                                                                                                                                                                                                                                                                                                    |
|                                                                                                                                                                                                                                                                                                                                                       | Coefficient of variation                                                                                                                                                                                                                                                                                                                              | 8.60                                                                                                                                                                                                                                                                                                                                                   |
|                                                                                                                                                                                                                                                                                                                                                       | <b>Average</b>                                                                                                                                                                                                                                                                                                                                        | <b>40.2</b>                                                                                                                                                                                                                                                                                                                                            |

**Figure S1a:** Contact angle picture of a PtRu/C catalyst slurry drop on a substrate Kapton film; PtRu/C in isopropyl alcohol (IPA) dispersion.

| Run 1                                                                              | Run 2                                                                              | Run 3                                                                               |
|------------------------------------------------------------------------------------|------------------------------------------------------------------------------------|-------------------------------------------------------------------------------------|
| 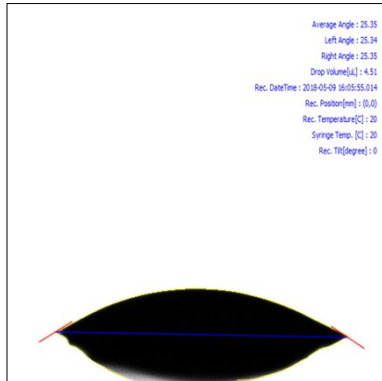  |   |  |
| Run 4                                                                              | Run 5                                                                              |                                                                                     |
|  |  |                                                                                     |
| Sample                                                                             | Run #                                                                              | Contact angle / °                                                                   |
| PtRu/C in MeOH                                                                     | 1                                                                                  | 25.4                                                                                |
|                                                                                    | 2                                                                                  | 29.2                                                                                |
|                                                                                    | 3                                                                                  | 37.6                                                                                |
|                                                                                    | 4                                                                                  | 37.2                                                                                |
|                                                                                    | 5                                                                                  | 35.7                                                                                |
|                                                                                    | Standard deviation                                                                 | 5.5                                                                                 |
|                                                                                    | Coefficient of variation                                                           | 16.54                                                                               |
|                                                                                    | <b>Average</b>                                                                     | <b>33.0</b>                                                                         |

**Figure S1b:** Contact angle picture of a PtRu/C catalyst slurry drop on a substrate Kapton film; PtRu/C in methanol (MeOH) dispersion.

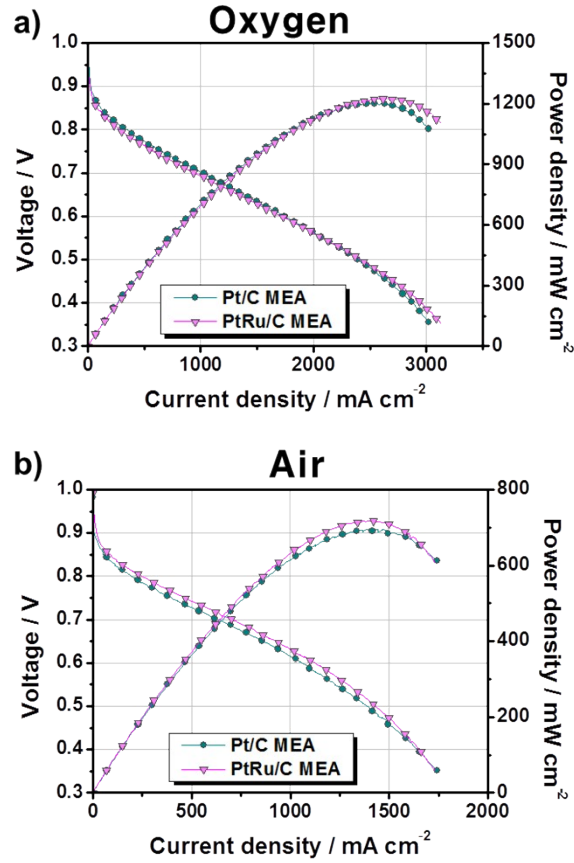

|            | Current density<br>at 0.6V (mA cm <sup>-2</sup> ) | Maximum Power Density<br>(mW cm <sup>-2</sup> ) | Current density<br>at 0.6V (mA cm <sup>-2</sup> ) | Maximum Power Density<br>(mW cm <sup>-2</sup> ) |
|------------|---------------------------------------------------|-------------------------------------------------|---------------------------------------------------|-------------------------------------------------|
| Pt/C MEA   | 1741                                              | 1202                                            | 1067                                              | 696                                             |
| PtRu/C MEA | 1722                                              | 1224                                            | 1146                                              | 747                                             |

**Figure S2:** Polarization and power density curves of Pt/C- and PtRu/C-based MEA using decal transfer method under a) H<sub>2</sub> / O<sub>2</sub> and b) H<sub>2</sub> / air. The active cell area was 5.0 cm<sup>2</sup> and test was performed at 70 °C and fully humidified H<sub>2</sub> and O<sub>2</sub> / air were used in the MEA under atmospheric pressure. The anode was commercial PtRu/C (53.5 wt.% TTK Catalyst, 0.20 mg<sub>Pt</sub> cm<sup>-2</sup>) and the cathode catalyst was a commercial Pt/C (40.0 wt.% JM Catalyst, 0.30 mg<sub>Pt</sub> cm<sup>-2</sup>)
